# Supplementary material for: A slow transcription rate causes embryonic lethality and perturbs kinetic coupling of neuronal genes
Source: PubMed Central journal article supplement (PMC6484407; doi:10.15252/embj.2018101244), 2019-04-15

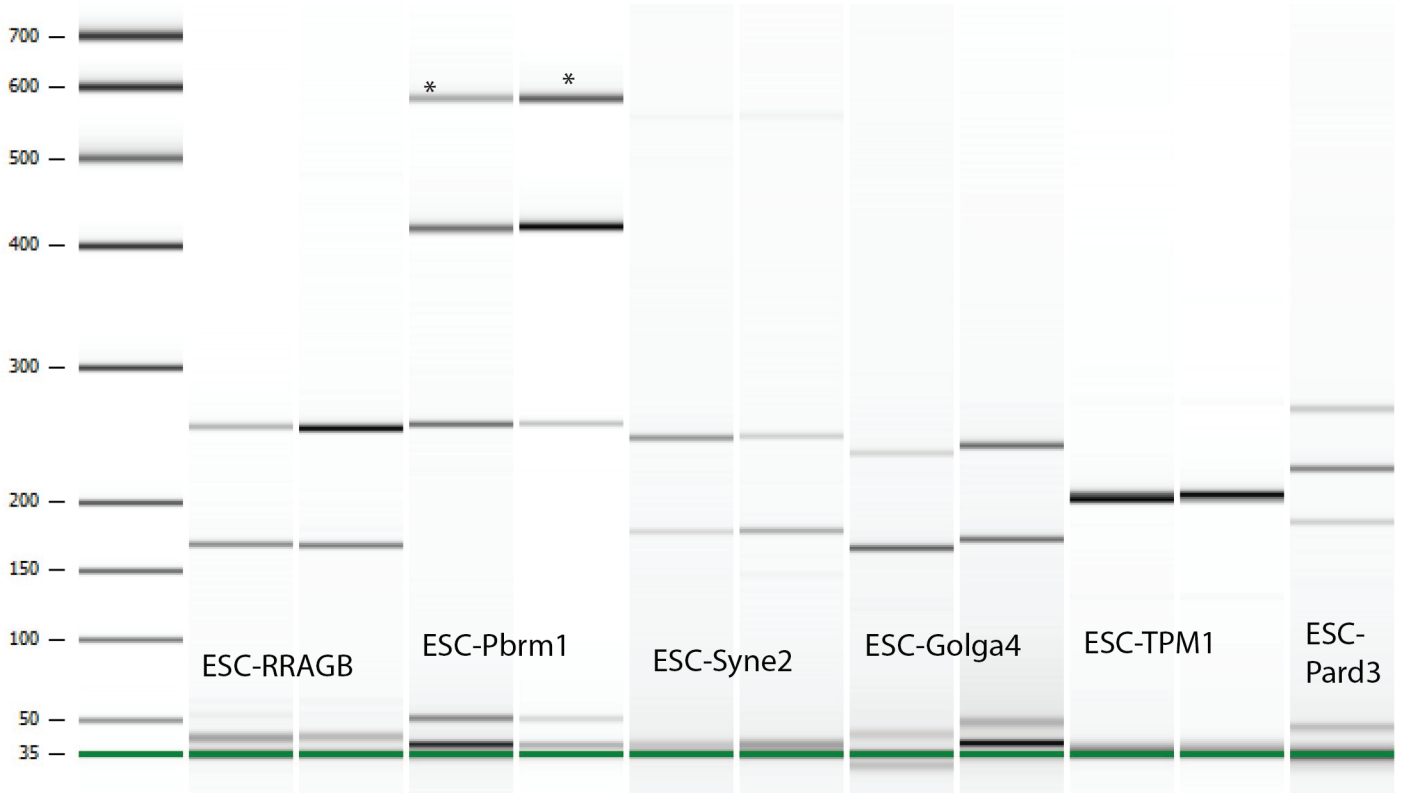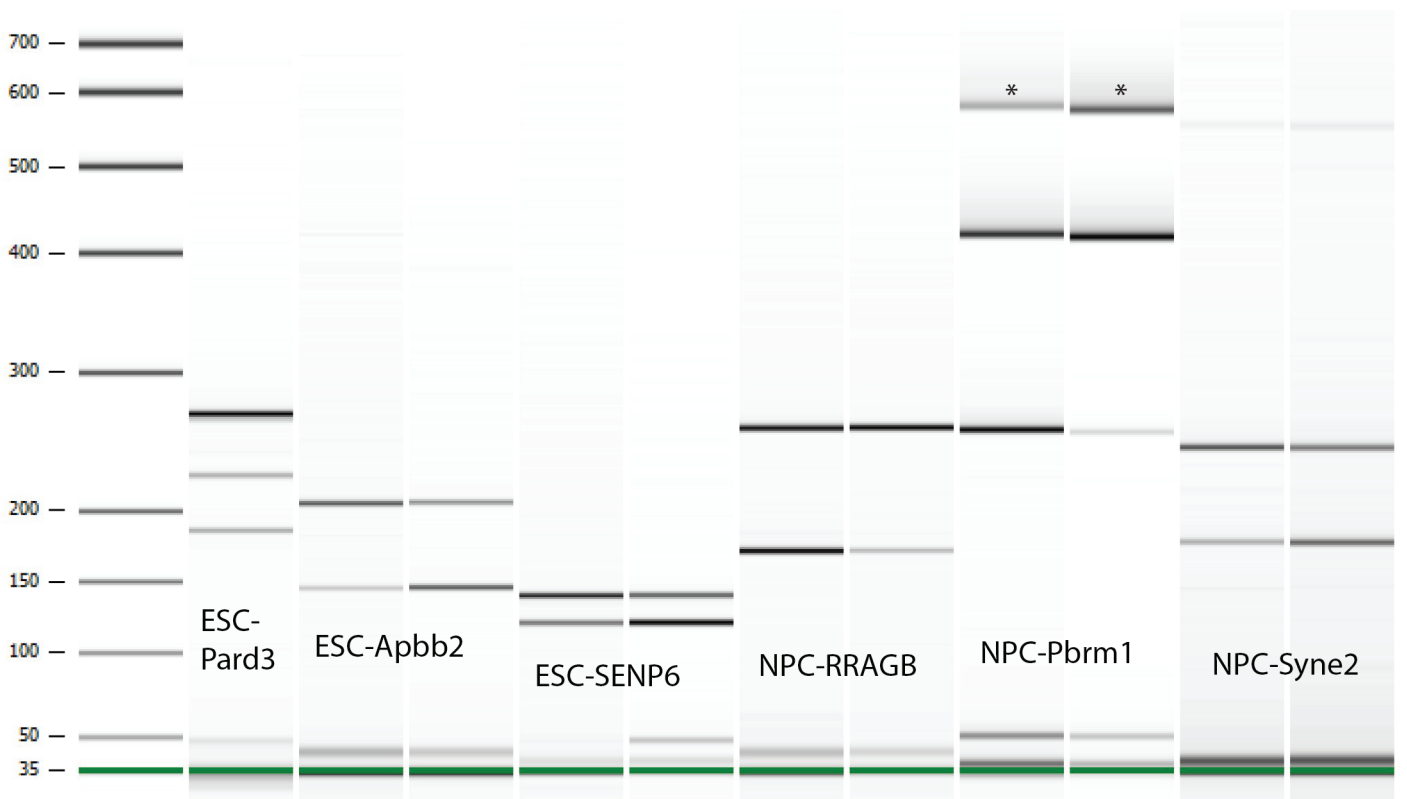

Supplement: EMBJ-38-e101244-s008.pdf [file EMBJ-38-e101244-s008.pdf]
